# Supplementary material for: Genomewide Association Study of African Children Identifies Association of SCHIP1 and PDE8A with Facial Size and Shape
Source: PLOS journal article supplement (doi:10.1371/journal.pgen.1006174), 2016-08-25
Supplement: S8 (10.1371/journal.pgen.1006174.s008) [file journal.pgen.1006174.s008]

**S1 File. 3D surfaces showing the morphs at the extremes and average points for allometry and PC1-5.**  
For each image, click on it to move it to the frontal view. The faces an then be rotated by holding the mouse or trackpad key down or by touch on a touchscreen. The morphs are scaled so as to represent the observed extremes of each distribution.

Allometry Click on each image to place in default view.

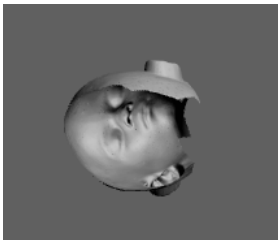

Min

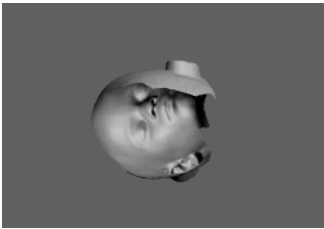

Average

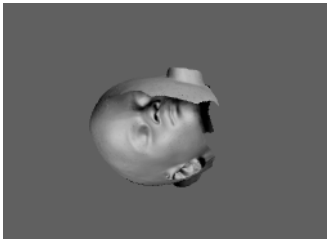

Max

PC1

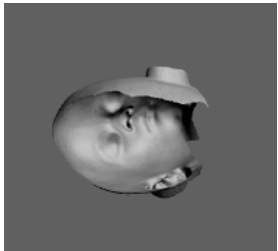

Min

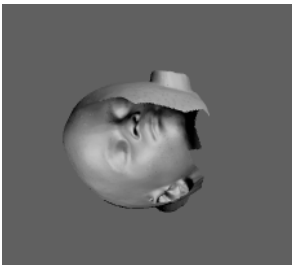

Average

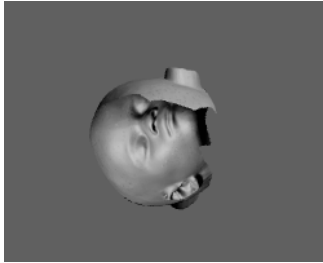

Max

PC2

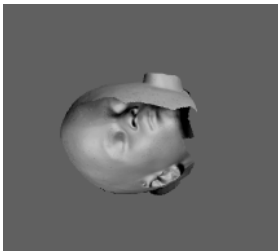

Min

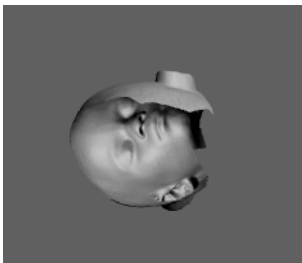

Average

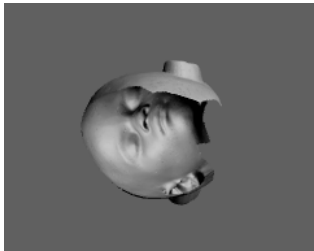

Max

PC3

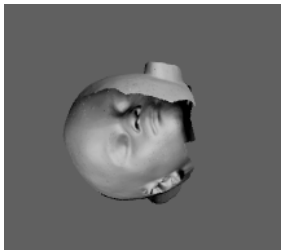

Min

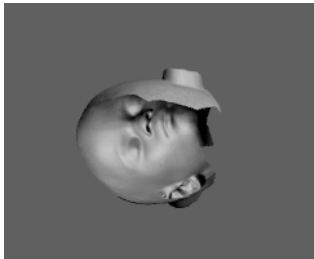

Average

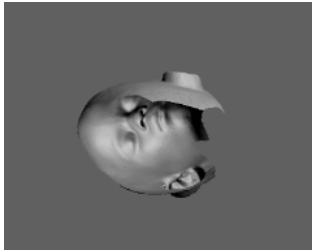

Max

PC4

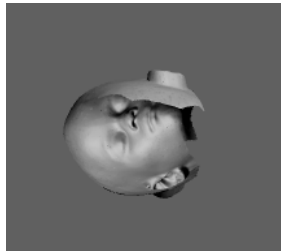

Min

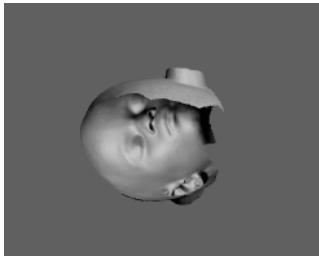

Average

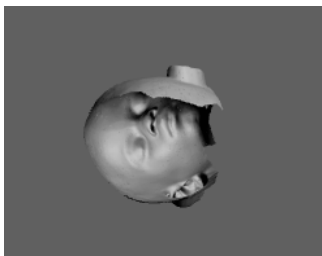

Max

PC5

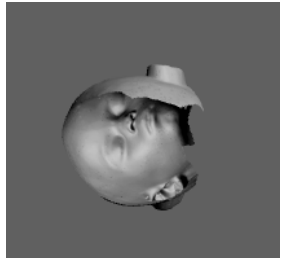

Min

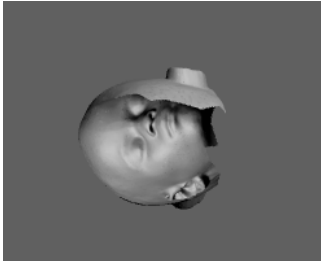

Average

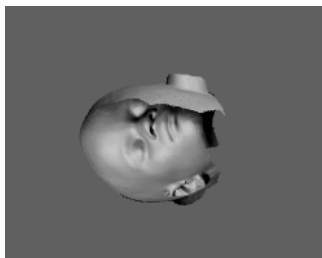

Max
